# Supplementary figures and images for: Clustering of Pediatric Brain Tumors in Texas, 2000–2017
Source: MDPI journal article supplement (doi:10.3390/toxics11040351), 2023-04-08

**Figure S1. Map of pediatric brain tumor clusters labeled, Texas, 2000-2017**

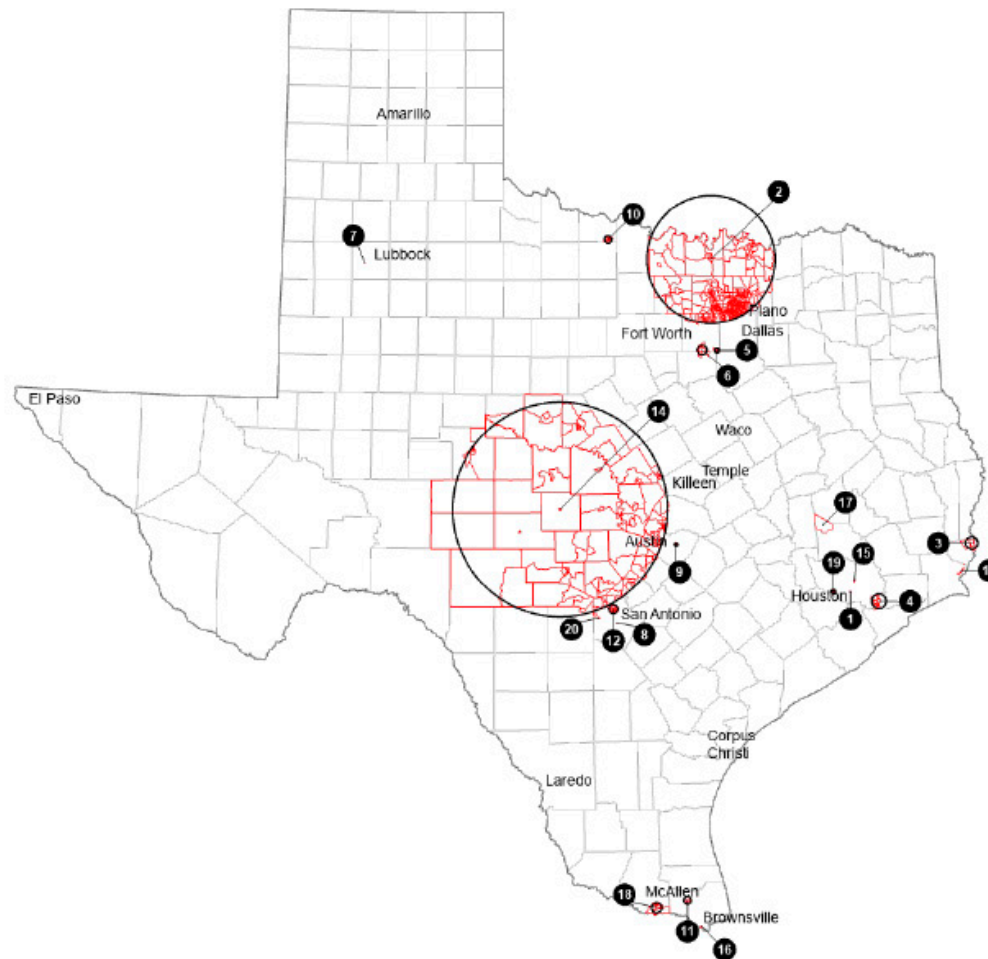

Supplement: s1 [file s1]
